# Supplementary material for: Quantitative genome-wide association analyses of receptive language in the Danish High Risk and Resilience Study
Source: BMC Neurosci. 2020 Jul 7;21:30. doi: 10.1186/s12868-020-00581-5 (PMC7341668; doi:10.1186/s12868-020-00581-5)
Supplement: Supplementary file 2 — Additional file 2: Table S1. Suggestive associations (P ≤ 0.00001) from the discovery analyses. [file 12868_2020_581_MOESM2_ESM.xlsx]

## Sheet: Table S1
Table S1: Suggestive associations (P ≤ 0.00001) from the discovery analyses.
Gene descriptions are taken from UCSC Genome Browser.
The effect size is X, Xpat or Xmat from the full model, depending on the test, relative to the effect allele.
Test	SNP	Chromosome	Position	A1	A2	Effect allele	Effect size	Number of informative children	P	Gene	Feature	Gene function	Featured in the GWAS Catalog?	Featured in PhenoScanner (min. suggestive)?
Paternal parent-of-origin test	rs11787922	9	82788836	T	G	T	-23.05	353	1.04e-08	NA	NA	NA	no	no
Paternal parent-of-origin test	rs4073930	16	23195646	C	T	C	-12.72	308	1e-07	SCNN1G	intron	Sodium channel, non-voltage-gated 1, gamma subunit	no	Yes; trait: heel bone mineral density
Paternal parent-of-origin test	rs16883593	4	30460011	G	A	G	-10.64	317	1e-06	NA	NA	NA	no	no
Paternal parent-of-origin test	exm509060	5	178410213	C	T	C	-32.6	353	2e-06	GRM6	exon	Glutamate metabotropic receptor	no	no
Paternal parent-of-origin test	psy_rs112842770	11	128047096	A	G	A	-21.95	367	3e-06	NA	NA	NA	no	no
Paternal parent-of-origin test	rs4632856	6	79212957	A	G	A	-15.46	337	4e-06	NA	NA	NA	no	no
Paternal parent-of-origin test	rs155162	6	120509191	T	C	T	-8.7	248	4e-06	NA	NA	NA	no	no
Paternal parent-of-origin test	rs2249441	2	74126457	G	A	G	-10.88	310	5e-06	ACTG2	intron	Smooth muscle actin found in enteric tissues	no	Yes; trait: height
Paternal parent-of-origin test	rs10878597	12	40840325	T	C	C	-3.35	254	5e-06	MUC19	exon	A member of the gel-forming mucin protein family	no	no
Paternal parent-of-origin test	rs895040	13	43791459	G	A	G	-12.19	353	5e-06	ENOX1	intron	The protein encoded by this gene is involved in plasma membrane electron transport pathways	no	no
Paternal parent-of-origin test	exm98149	1	152083325	T	A	T	-9.94	307	9e-06	TCHH	exon	The protein encoded by this gene forms crosslinked complexes with itself and keratin intermediate filaments to provide mechanical strength to the hair follicle inner root sheath	no	no
Paternal parent-of-origin test	exm845709	10	98742750	C	A	C	-19.84	363	9e-06	C10orf12	exon	NA	no	no
Paternal parent-of-origin test	psy_rs61800598	1	165438375	A	C	A	-29.57	371	1e-05	NA	NA	NA	no	Yes; trait: cause of death: appendix
Paternal parent-of-origin test	psy_rs12116805	1	214423797	A	T	A	-9.46	294	1e-05	NA	NA	NA	no	Yes; trait: current tobacco smoking; longest period of depression
Paternal parent-of-origin test	exm449240	5	34998894	C	G	C	-13.91	346	1e-05	AGXT2	exon	The protein encoded by this gene is a class III pyridoxal-phosphate-dependent mitochondrial aminotransferase	no	no
General test	rs12297354	12	30560845	A	C	A	-10.25	394	7e-06	NA	NA	NA	no	no
General test	rs2236018	12	114832360	A	G	A	-4.92	394	8e-06	TBX5	intron	A member of a phylogenetically conserved family of genes that share a common DNA-binding domain, the T-box. T-box genes encode transcription factors involved in the regulation of developmental processes	no	no
General test	rs11787922	9	82788836	T	G	T	-9.46	394	9e-06	NA	NA	NA	no	no
General test	exm-rs10472828	5	32888818	T	C	T	-4.87	398	1e-05	NA	NA	NA	Yes; trait: body height	Yes; trait: height, body height, diastolic blood pressure; systolic blood pressure; sitting height; self-reported hypertension; Vascular or heart problems diagnosed by doctor
Maternal parent-of-origin test	rs9397338	6	150913528	A	G	G	-9.95	293	8e-06	NA	NA	NA	no	no
Maternal parent-of-origin test	rs3731769	2	162107295	C	A	A	-8.66	281	1e-05	LOC101929512	intron	NA	no	Yes; trait: qualifications: college or university degree; tense or highly strung; autism
Maternal parent-of-origin test	psy_rs143762454	4	1501135	C	T	C	-18.56	363	1e-05	NA	NA	NA	no	no
